# Supplementary material for: Identification of a Novel Papillomavirus Associated with Squamous Cell Carcinoma in a Domestic Cat
Source: MDPI journal article supplement (doi:10.3390/v12010124), 2020-01-20
Supplement: s1 [file s1]

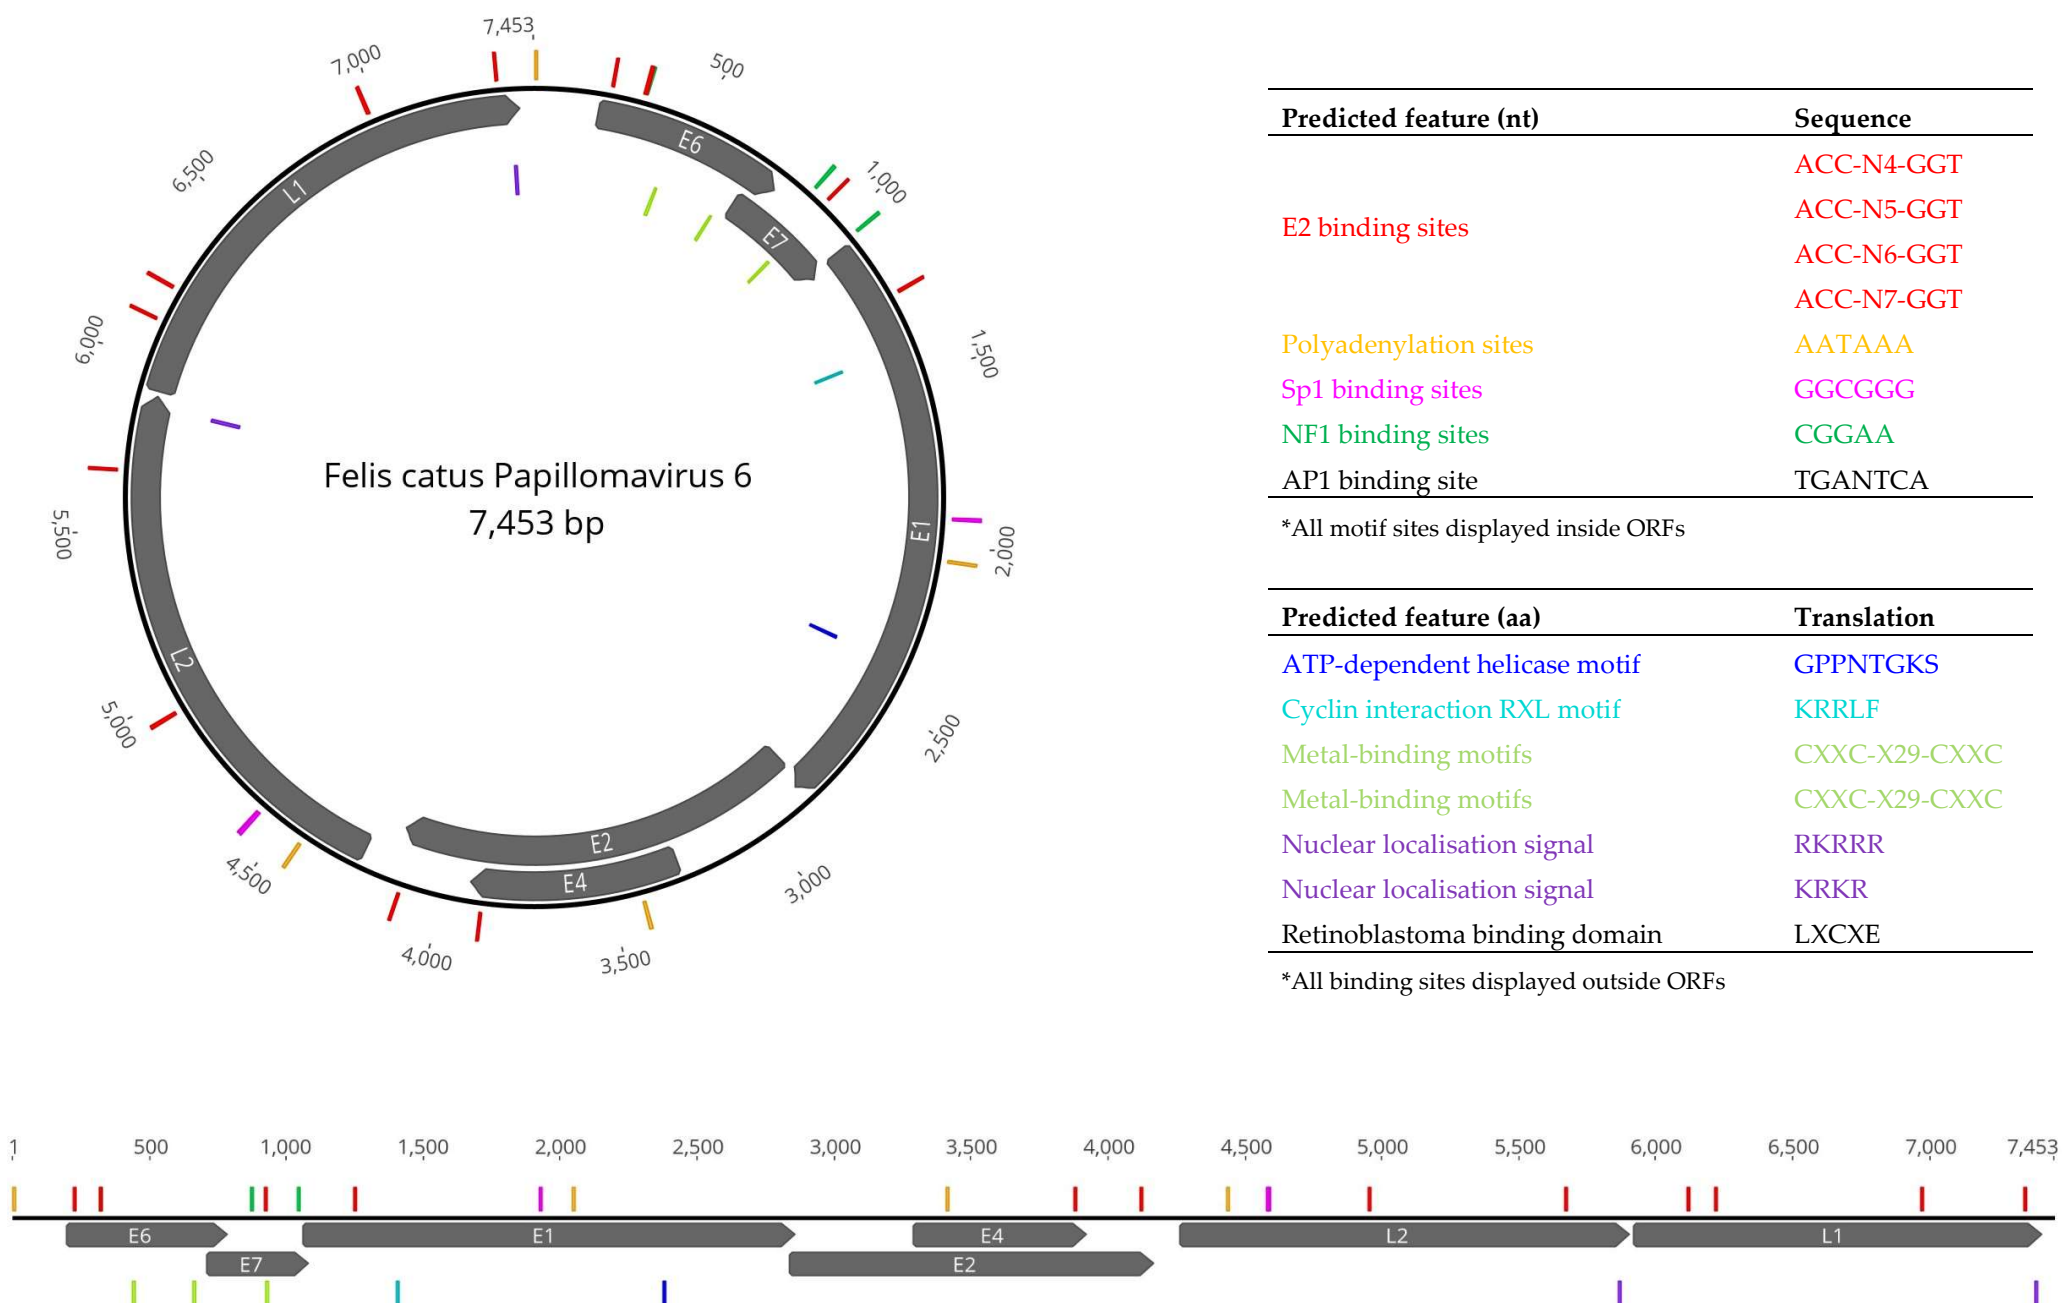

Figure S1 Felis catus Papillomavirus 6 (FcaPV6) genome configuration and nucleotide (nt) and amino acid (aa) feature location.
